# Supplementary material for: Salification-driven strategy toward the hydrophobic molecular salt of the antifungal drug 5-fluorocytosine and protocatechuic acid with triple-helix structure offers an innovative insight for conquering adverse drug reactions
Source: Royal Society of Chemistry journal article supplement (doi:10.1039/d2ce01523d), 2023-01-01
Supplement: d2ce01523d1.pdf [file d2ce01523d1.pdf]

## Supplementary Information

**Salification-driven strategy toward the hydrophobic molecular salt of antifungal drug 5-fluorocytosine and protocatechuic acid with triple-helix structure offers an innovative insight for conquering adverse drug reactions<sup>†</sup>**

**Fan-Zhi Bu,<sup>1,+</sup> Yue-Ming Yu,<sup>1,+</sup> Lin-Lin Zhang,<sup>1</sup> Cui-Wei Yan,<sup>\*,1</sup> Zhi-Yong Wu,<sup>1,2</sup> Yan-Tuan Li,<sup>\*,1,2</sup>**

*1. School of Medicine and Pharmacy, College of Marine Life Science, Ocean University of China, Qingdao, Shandong 266003, P.R. China.*

*2. Laboratory for Marine Drugs and Bioproducts, Qingdao National Laboratory for Marine Science, Qingdao, Shandong, P.R. China.*

\*Corresponding authors

<sup>†</sup>These authors contributed equally to this work.

## Contents

### Section 1. The definition and formulas related to topology analysis

### Section 2. Supplementary table and figures

| Description                                                                                                                                                                                                              | Page No. |
|--------------------------------------------------------------------------------------------------------------------------------------------------------------------------------------------------------------------------|----------|
| <b>Table S1</b> Main FT-IR bands ( $\text{cm}^{-1}$ ) for FYT, PCA and molecular salt FYT-PCA.                                                                                                                           | 3        |
| <b>Fig. S1</b> FT-IR spectra of FYT, PCA and molecular salt FYT-PCA.                                                                                                                                                     | 4        |
| <b>Fig. S2</b> The MEP draws for FYT and PCA ions, where the yellow and green balls represent the $L_{\text{max}}$ and $L_{\text{min}}$ points, and mark their corresponding quantitative values indicated by the arrow. | 4        |
| <b>Fig. S3</b> PXRD comparison of the molecular salt's simulated pattern and the residual solids after the powder dissolution measurements.                                                                              | 5        |
| <b>Fig. S4</b> The DSC curves of FYT and PCA raw material.                                                                                                                                                               | 5        |

## Section 1. The definition and formulas related to topology analysis

Following the AIM concept, the critical points (CPs) are defined as the point where the gradient mode of the actual space function equals zero.<sup>1</sup> Specifically, the CPs at (3,+1) are the first saddle point of the electron density function, which commonly occurs in circular systems.<sup>2</sup> Emphatically, the CPs at (3,-1), that is, bond critical points (BCPs), as the second saddle point of the electron density function, are ordinarily distributed at bond path (3,-1) between two atoms bonding with non-covalent peculiarity. Herein, the topology research mainly concentrates on the AIM analysis at BCPs, namely the CPs at (3,-1), because it can supply certain pivotal clues utilizing relevant parameters to explore the intermolecular hydrogen bonds in strength. Lu has published reliable computational formulas (1) and (2) for quantitatively evaluating the hydrogen bond strength by analyzing and verifying the wave function for many hydrogen bond systems using the electron density at the BCPs. The formula is as follows:<sup>3</sup>

$$\Delta E = -233.08 \times \rho(r) + 0.7423 \quad (1)$$

$$\Delta E = -332.34 \times \rho(r) - 1.0661 \quad (2)$$

Where  $\Delta E$  denotes the hydrogen bond energy,  $\rho(r)$  represents the electron density at BCPs. Of particular note, equation (1) applies to the neutral system, and formula (2) is appropriate for ionic system. Noticeably, the intensity of hydrogen bond interaction serves as a decisive character in physicochemical properties due to these crucial topology parameters being closely related to crystal stacking patterns and structural characteristics. Hence, it is adequately necessary to build an interrelation between the microcosmic structure and the macroscopic property of the molecular salt system.

### References

- [1] J. H. Li, W. J. Huang, T. Xu, S. R. Kirk and S. Jenkins, *Int. J. Quantum Chem.*, 2018, e25847.
- [2] R. G. Parr, P. W. Ayers and R. F. Nalewajski, *J. Phys. Chem. A*, 2005, **109**, 3957-3959.
- [3] S. Emamian, T. Lu, H. Kruse and H. Emamian, *J. Comput. Chem.*, 2019, **40**, 2868-2881.

## Section 2. Supplementary table

**Table S1** Main FT-IR bands ( $\text{cm}^{-1}$ ) for FYT, PCA and molecular salt FYT-PCA.

| FYT  | PCA  | FYT-PCA | Assignment                      |
|------|------|---------|---------------------------------|
| 3133 | -    | -       | $\nu(\text{NH})$                |
| -    | -    | 3179    | $\nu(\text{NH}^+)$              |
| 3406 | -    | 3410    | $\nu(\text{NH}_2)$              |
| 1687 | -    | 1730    | $\nu(\text{C}=\text{O})$        |
| -    | 1683 | -       | $\nu(\text{COOH})$              |
| -    | -    | 1539    | $\nu_{\text{as}}(\text{COO}^-)$ |
| -    | -    | 1364    | $\nu_{\text{s}}(\text{COO}^-)$  |
| -    | 3332 | 3291    | $\nu(-\text{OH})$               |
| 1338 | -    | -       | $\nu(-\text{N}=\text{C}-)$      |

## Section 2. Supplementary figures

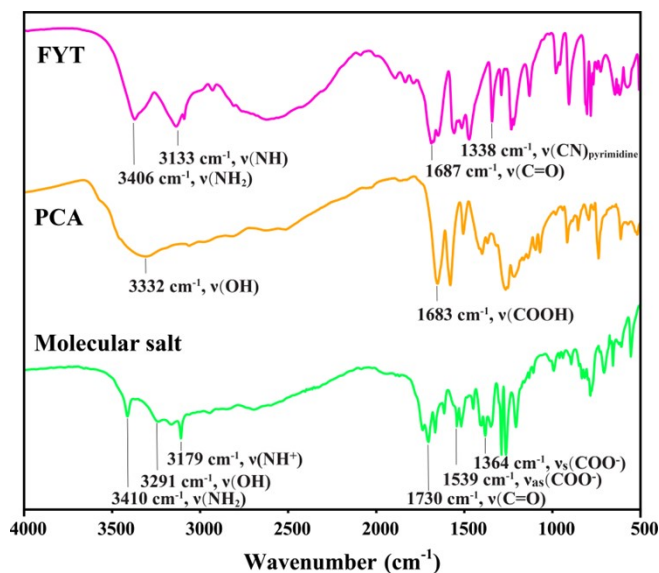**Fig. S1** FT-IR spectra of FYT, PCA and molecular salt FYT-PCA.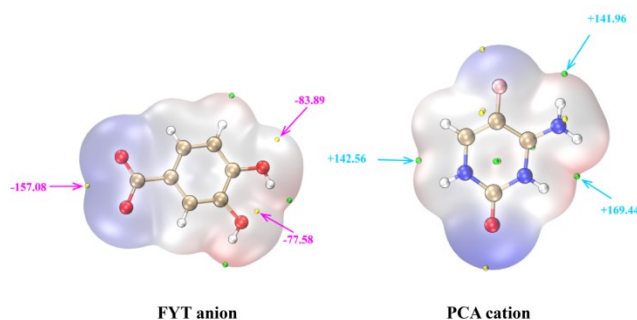**Fig. S2** The MEP draws for FYT and PCA ions, where the yellow and green balls represent the  $L_{\text{max}}$  and  $L_{\text{min}}$  points, and mark their corresponding quantitative values indicated by the arrow. The unit is in  $\text{kcal}\cdot\text{mol}^{-1}$ .

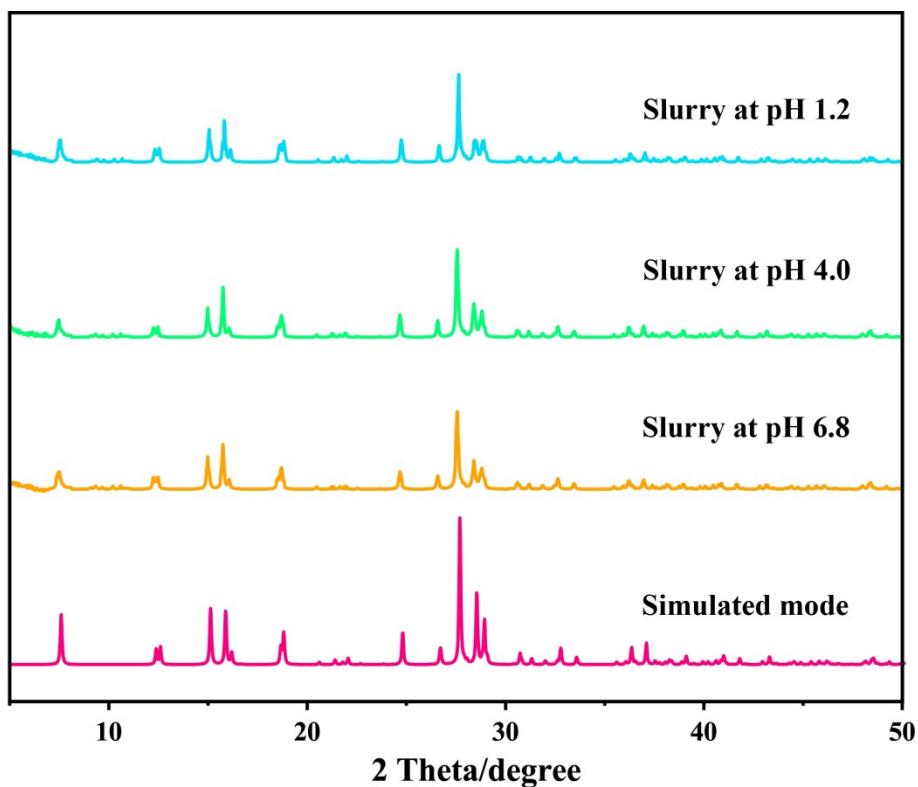

Fig. S3 PXR D comparison of the molecular salt's simulated pattern and the residual solids after the powder dissolution measurements.

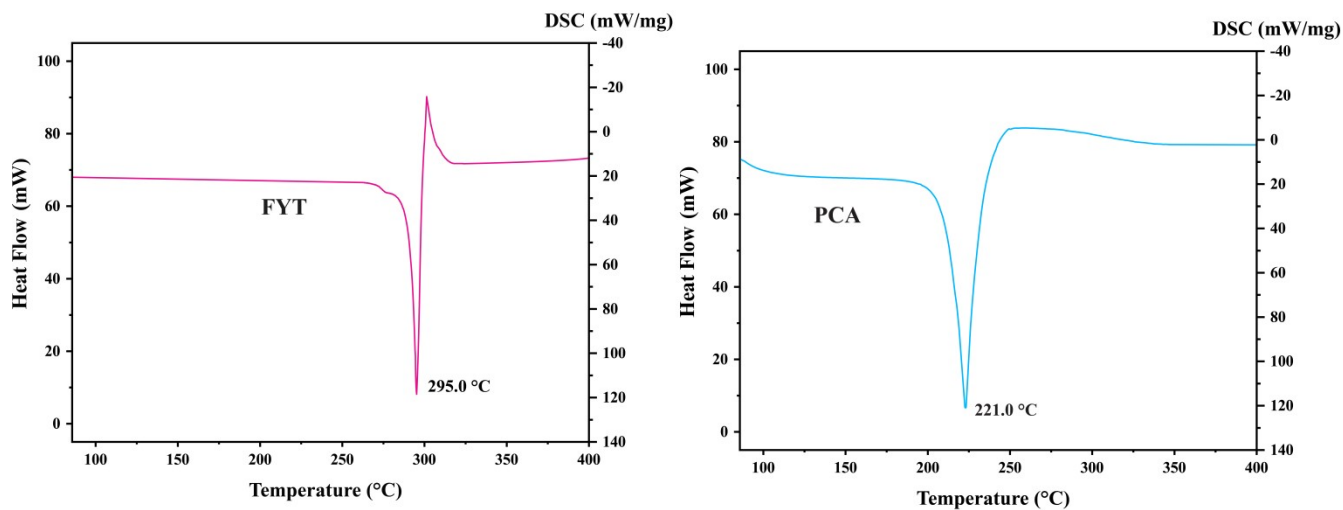

Fig. S4 The DSC curves of FYT and PCA raw material.
